# Supplementary material
Source: publisher figshare collection journal article supplement (https://acs.figshare.com/ndownloader/files/14671820)
Supplement: Supplementary file 1 [file 14671820]

Supporting Information for

From Compost to Colloids – Valorization of Spent  
Mushroom Substrate

*Sebastian J. Beckers,<sup>a</sup> Irantzu Alegria Dallo,<sup>b</sup> Inés del Campo,<sup>b</sup> Christine Rosenauer,<sup>a</sup> Katja Klein,<sup>a</sup> Frederik R. Wurm<sup>a,\*</sup>*

<sup>a</sup> Max Planck Institute for Polymer Research, Ackermannweg 10, 55128 Mainz, Germany.

wurm@mpip-mainz.mpg.de

<sup>b</sup> CENER, Avenida Ciudad de la Innovacion 7, 31621 Sarriguren, Spain. ialegria@cener.com

\*corresponding author

## List of tables

**Table S1.** Compositional analysis of carbohydrate-enriched extracts obtained after thermochemical pretreatments of SMS/WS mixtures. 4

**Table S2.** Compositional analysis of filter cake obtained after thermochemical pretreatments of SMS/WS mixtures. 4

**Table S3.** Compositional analysis of lignin enriched extracts obtained after organosolv treatments of SMS alone or of a pretreated SMS-WS mixture. 5

**Table S4.** Interfacial tension measured by spinning drop tensiometry between  $\text{CHCl}_3$  and water at a concentration of  $10.0 \text{ mg mL}^{-1}$ . 5

**Table S5.** Distribution coefficient between milliQ water (pH7) and octanol at a concentration of  $2.5 \text{ mg mL}^{-1}$ . 5

## List of figures

**Figure S1.**  $^1\text{H}$  NMR spectra ( $\text{DMSO-d}_6$ ,  $25^\circ\text{C}$ , 300 MHz) of SMS extracts, obtained either after thermochemical treatments (top) or after Organosolv extraction (bottom). 6

**Figure S2.** Overlay of FT-IR (KBr) spectra of lignin enriched SMS extracts obtained after Organosolv treatment (red) compared to a commercial lignin (black). 7

**Figure S3.** SEM images of polystyrene nanoparticles prepared by free-radical 7  
mini-emulsion polymerization of styrene, stabilized with the SMS-derived biobased  
surfactant.

**Figure S4.** TEM image of nanocarriers obtained from SMS-derived lignin (from 8  
Organosolv process).

**Figure S5.** SEC elugrams using UV-detection (270 nm, left) or RI-detection (right) from 8  
extracts obtained from thermochemical pretreatments under 160°C, 175°C or 190°C  
without catalyst.

**Figure S6.** SEC elugrams using UV-detection (270 nm, left) or RI-detection (right) from 9  
extracts obtained from thermochemical pretreatments under 190°C using different  
catalysts.

**Figure S7.** Composition of pristine SMS and a SMS-wheat straw mixture (ratio 4:6). All 9  
fractions are given in weight % of dry mass. The carbohydrates include glucan, xylan,  
arabinan, glucose, xylose and arabinose. Exemplarily, a) the amount of lignin isolated  
using Organosolv extraction (EtOH-Water 50:50) or b) the amount of isolated  
carbohydrates applying a thermochemical pretreatment (190°C, catalyst: H<sub>2</sub>SO<sub>4</sub>) is  
shown.

**Figure S8.** SEC elugrams of “organosolv extract” obtained after extraction with an 10  
EtOH-water mixture (50:50). (M = Monomer; D = Dimer; T = Trimer)



**Table S1.** Compositional analysis of carbohydrate-enriched extracts obtained after thermochemical pretreatments of SMS/WS mixtures.

|                                        |               |     |               |     |               |     |               |     |               |     |               |      |
|----------------------------------------|---------------|-----|---------------|-----|---------------|-----|---------------|-----|---------------|-----|---------------|------|
| Temperature °C                         | 160           |     | 175           |     | 190           |     | 190           |     | 190           |     | 192           |      |
| Residence time (min)                   | 10            |     | 10            |     | 10            |     | 10            |     | 10            |     | 10            |      |
| Catalyst                               | -             |     | -             |     | -             |     | NaOH 4%       |     | Na2CO3 4%     |     | H2SO4 4%      |      |
| Feedstock code                         | 030/17-031/17 |     | 030/17-031/17 |     | 030/17-031/17 |     | 030/17-031/17 |     | 030/17-031/17 |     | 062/13+005/17 |      |
| Sample code                            | EXP2_LF       |     | EXP3_LF       |     | EXP4_LF       |     | EXP8-LF       |     | EXP12_LF      |     | EXP9_LF       |      |
| g/L                                    | Avg.          | SD   |
| <b>Monomeric and oligomeric sugars</b> |               |     |               |     |               |     |               |     |               |     |               |      |
| Glucose                                | 7,2           | 0,2 | 8,1           | 0,5 | 6,2           | 0,0 | 7,2           | 0,3 | 5,0           | 0,2 | 3,5           | 0,0  |
| Xylose                                 | 16,4          | 0,3 | 29,9          | 1,5 | 33,8          | 0,1 | 29,3          | 1,6 | 23,5          | 1,1 | 13,9          | 0,1  |
| Arabinose                              | 3,3           | 0,0 | 4,3           | 0,2 | 1,6           | 0,0 | 2,8           | 0,1 | 3,4           | 0,2 | 0,5           | 0,0  |
| <b>Organic acids</b>                   |               |     |               |     |               |     |               |     |               |     |               |      |
| Succinic Acid                          | 0,1           | 0,0 | 0,1           | 0,0 | 0,0           | 0,0 | 0,1           | 0,0 | 0,1           | 0,0 | 0,0           | 0,0  |
| Lactico acid                           | 0,2           | 0,0 | 0,5           | 0,0 | 0,8           | 0,0 | 1,2           | 0,0 | 0,4           | 0,0 | 0,1           | 0,0  |
| Acetic acid                            | 1,5           | 0,0 | 3,1           | 0,0 | 4,8           | 0,0 | 9,6           | 0,0 | 8,3           | 0,0 | 3,4           | 0,1  |
| Levulinic acid                         | 0,3           | 0,0 | 0,2           | 0,0 | 0,0           | 0,0 | 0,2           | 0,0 | 0,1           | 0,0 | 0,1           | 0,0  |
| mg/L                                   | Avg.          | SD   |
| 5HMF                                   | 488,7         | 0,0 | 258,3         | 0,0 | 294,9         | 0,0 | 38,7          | 0,0 | 53,9          | 0,0 | 744,5         | 25,4 |
| 4-hydroxybenzoic                       | 17,1          | 0,0 | 13,9          | 0,0 | 11,1          | 0,0 | 1,7           | 0,0 | 6,6           | 0,0 | 17,5          | 20,9 |
| Vanillin/syringic                      | 71,1          | 0,0 | 83,3          | 0,0 | 63,7          | 0,0 | 54,2          | 0,0 | 69,9          | 0,0 | 99,7          | 4,4  |
| p-Coumaric                             | 24,5          | 0,0 | 14,8          | 0,0 | 6,0           | 0,0 | 12,9          | 0,0 | 7,7           | 0,0 | 7,9           | 0,7  |
| Furfural                               | 43,0          | 0,0 | 70,6          | 0,0 | 342,4         | 0,0 | 100,7         | 0,0 | 39,5          | 0,0 | 1411,7        | 15,0 |
| Ferulic acid                           | 6,5           | 0,0 | 10,7          | 0,0 | 16,4          | 0,0 | 4,4           | 0,0 | 12,5          | 0,0 | 11,7          | 1,2  |
| Vainillin/syringaldehyde               | 40,1          | 0,0 | 42,9          | 0,0 | 56,0          | 0,0 | 20,2          | 0,0 | 24,4          | 0,0 | 90,1          | 3,8  |
| 5Methylfurfural                        | 2,5           | 0,0 | 4,9           | 0,0 | 14,1          | 0,0 | 8,7           | 0,0 | 6,8           | 0,0 | 39,6          | 0,7  |
| Phenol                                 | 0,0           | 0,0 | 0,0           | 0,0 | 12,2          | 0,0 | 0,0           | 0,0 | 0,0           | 0,0 | 0,0           | 0,0  |
| Benzoic                                | 0,0           | 0,0 | 0,0           | 0,0 | 0,0           | 0,0 | 29,9          | 0,0 | 51,8          | 0,0 | 0,0           | 0,0  |
| Syringol                               | 0,0           | 0,0 | 0,0           | 0,0 | 0,0           | 0,0 | 23,3          | 0,0 | 0,0           | 0,0 | 0,0           | 0,0  |
| Guayacol                               | 0,0           | 0,0 | 0,0           | 0,0 | 0,0           | 0,0 | 10,4          | 0,0 | 16,4          | 0,0 | 0,0           | 0,0  |
| Benzaldehyde                           | 0,0           | 0,0 | 0,0           | 0,0 | 0,0           | 0,0 | 0,0           | 0,0 | 0,0           | 0,0 | 0,0           | 0,0  |

**Table S2.** Compositional analysis of filter cake obtained after thermochemical pretreatments of SMS/WS mixtures.

|                      |               |     |               |     |               |     |                     |     |               |     |               |     |
|----------------------|---------------|-----|---------------|-----|---------------|-----|---------------------|-----|---------------|-----|---------------|-----|
| Temperature °C       | 160           |     | 175           |     | 190           |     | 190                 |     | 190           |     | 192           |     |
| Residence time (min) | 10            |     | 10            |     | 10            |     | 10                  |     | 10            |     | 10            |     |
| Catalyst             | -             |     | -             |     | -             |     | NaOH                |     | Na2CO3        |     | H2SO4 4%      |     |
| Feedstock code       | 030/17-031/17 |     | 030/17-031/17 |     | 030/17-031/17 |     | 030/17-031/1 13/062 |     | 030/17-031/17 |     | 13/062+005/17 |     |
| Sample code          | EXP2_SF       |     | EXP3_SF       |     | EXP4_SF       |     | EXP8-SF             |     | EXP12_SF      |     | EXP5_SF       |     |
| %w/w                 | Avg.          | SD  | Avg.          | SD  | Avg.          | SD  | Avg.                | SD  | Avg.          | SD  | Avg.          | SD  |
| Moisture             | 7,7           | 0,0 | 8,6           | 0,0 | 8,7           | 0,1 | 10,5                | 0,1 | 9,8           | 0,1 | 59,3          | 0,3 |
| Ashes                | 67,7          | 0,4 | 62,9          | 1,2 | 65,7          | 0,3 | 63,1                | 0,3 | 60,6          | 0,8 | 12,3          | 0,5 |
| <b>Insolubles</b>    |               |     |               |     |               |     |                     |     |               |     |               |     |
| Glucan               | 31,8          | 0,0 | 32,3          | 0,7 | 35,4          | 0,1 | 34,0                | 0,7 | 34,2          | 0,3 | 34,0          | 0,4 |
| Xylan                | 18,7          | 0,0 | 14,8          | 0,1 | 6,2           | 0,0 | 8,8                 | 0,0 | 13,3          | 0,0 | 2,8           | 0,1 |
| Arabinan             | 1,3           | 0,0 | 0,7           | 0,0 | 0,2           | 0,0 | 0,3                 | 0,0 | 0,6           | 0,0 | 0,0           | 0,0 |
| Al Lignin            | 18,4          | 0,0 | 19,6          | 0,4 | 24,4          | 0,1 | 24,4                | 0,5 | 21,7          | 0,3 | 31,9          | 0,1 |
| AS Lignin            | 0,8           | 0,0 | 0,7           | 0,0 | 0,9           | 0,0 | 1,2                 | 0,0 | 0,8           | 0,0 | 1,2           | 0,0 |
| Al Ash               | 1,8           | 0,0 | 2,0           | 0,1 | 2,4           | 0,0 | 2,6                 | 0,0 | 2,1           | 0,1 | 3,0           | 0,1 |

**Table S3.** Compositional analysis of lignin enriched extracts obtained after organosolv treatments of SMS alone or of a pretreated SMS-WS mixture.

| Temperatura (°C) | SMS alone (before Organosolv) |     | 250              |     | 250              |     | 250              |     |
|------------------|-------------------------------|-----|------------------|-----|------------------|-----|------------------|-----|
| Etanol:H2O       |                               |     | 50:50            |     | 60:40            |     | 70:30            |     |
| Tsolids (%w/w)   |                               |     | 10               |     | 10               |     | 10               |     |
| Code             | (015/18) SMS_EXT 28-SF        |     | SMS_Ext26_RAC-01 |     | SMS_EXT28_RAC-02 |     | SMS_EXT28_RAC-03 |     |
|                  | Avg.                          | SD  | Avg.             | SD  | Avg.             | SD  | Avg.             | SD  |
| Glucan           | 8,2                           | 0,8 | 5,3              | 0,2 | 4,4              | 0,1 | 5,6              | 0,5 |
| Xylose           | 0,4                           | 0,1 | 0,2              | 0,0 | 0,2              | 0,0 | 0,3              | 0,0 |
| Arabinan         | 0,0                           | 0,0 | 0,0              | 0,0 | 0,0              | 0,0 | 0,0              | 0,0 |
| Al Lignin        | 27,0                          | 0,0 | 17,1             | 0,5 | 18,3             | 0,2 | 18,3             | 0,0 |
| AS Lignin        | 0,4                           | 0,0 | 0,9              | 0,0 | 0,4              | 0,0 | 0,3              | 0,0 |
| Al Ash           | 9,2                           | 0,2 | 5,3              | 0,0 | 5,8              | 0,0 | 6,2              | 0,1 |

**Table S4.** Interfacial tension measured by spinning drop tensiometry between CHCl<sub>3</sub> and water at a concentration of 10.0 mg mL<sup>-1</sup>.

| Sample code             | Catalyst                             | Interfacial Tension<br>/ Nm m <sup>-1</sup> |
|-------------------------|--------------------------------------|---------------------------------------------|
| 030/17-031/17 Exp 4 LF  | -                                    | 7.3 ± 0.45                                  |
| 030/17-031/17 Exp 8 LF  | NaOH (4%)                            | 10.00 ± 0.03                                |
| 030/17-031/17 Exp 12 LF | Na <sub>2</sub> CO <sub>3</sub> (4%) | 11.11 ± 0.46                                |
| 062/13-005/17 Exp 5 LF  | H <sub>2</sub> SO <sub>4</sub> (4%)  | 11.36 ± 0.01                                |

**Table S5.** Destribution coefficient between milliQ water (pH7) and octanol at a concentration of 2.5 mg mL<sup>-1</sup>.

| Sample code            | Catalyst  | LogD = log(c <sub>octanol</sub> )-log(c <sub>water</sub> ) |
|------------------------|-----------|------------------------------------------------------------|
| 030/17-031/17 Exp 4 LF | -         | -0.42                                                      |
| 030/17-031/17 Exp 8 LF | NaOH (4%) | -0.92                                                      |

030/17-031/17 Exp 12 LF

$\text{Na}_2\text{CO}_3$  (4%)

-0.98

062/13-005/17 Exp 5 LF

$\text{H}_2\text{SO}_4$  (4%)

-0.66

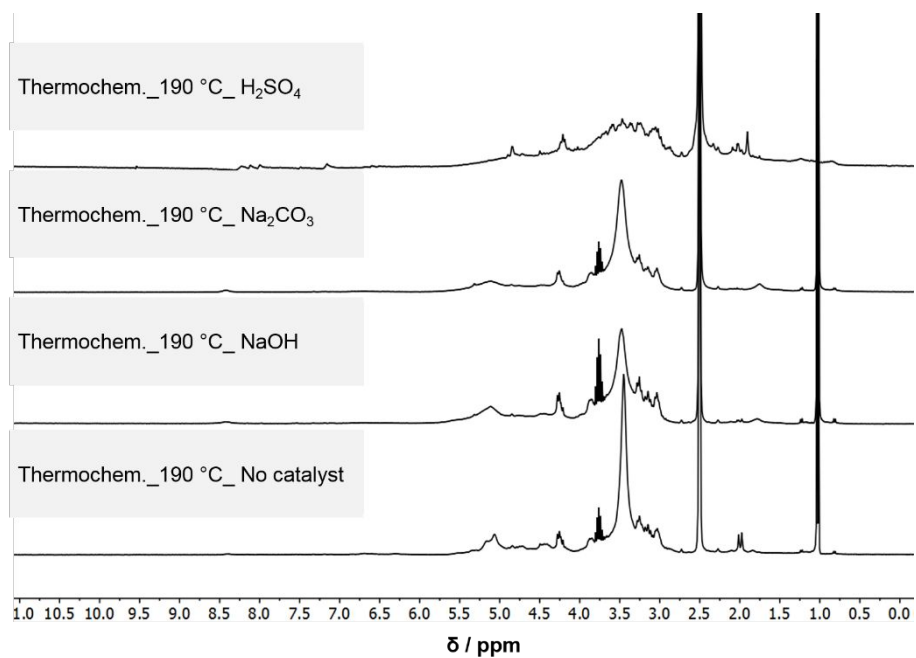

Organosolv\_EtOH/ $\text{H}_2\text{O}$  1/1\_  $\text{H}_2\text{SO}_4$  Pretreated SMS

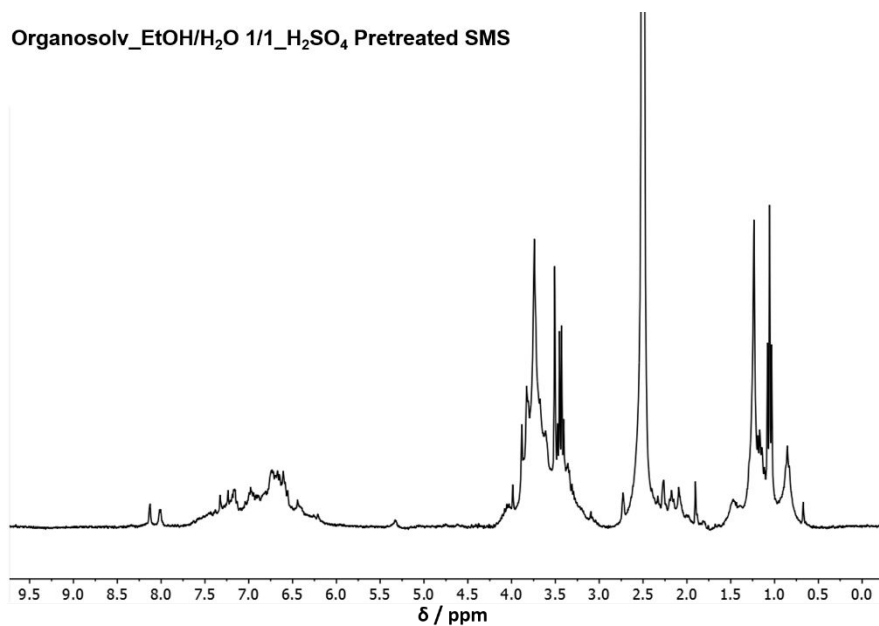

**Figure S1.**  $^1\text{H}$  NMR spectra (DMSO- $d_6$ , 25°C, 300 MHz) of SMS extracts, obtained either after thermochemical treatments (top) or after Organosolv extraction (bottom).

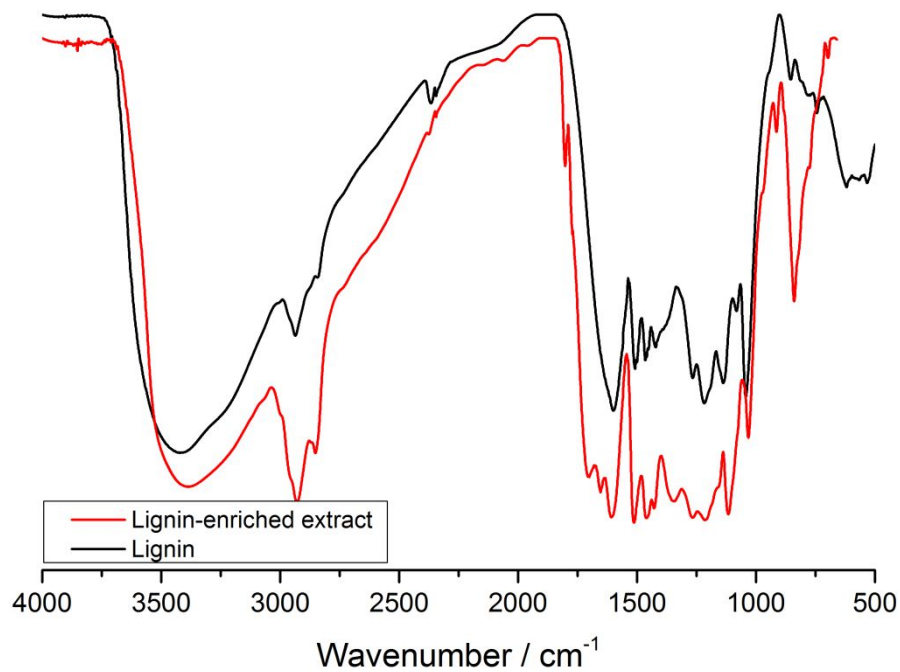

**Figure S2.** Overlay of FT-IR (KBr) spectra of lignin enriched SMS extracts obtained after Organosolv treatment (red) compared to a commercial lignin (black).

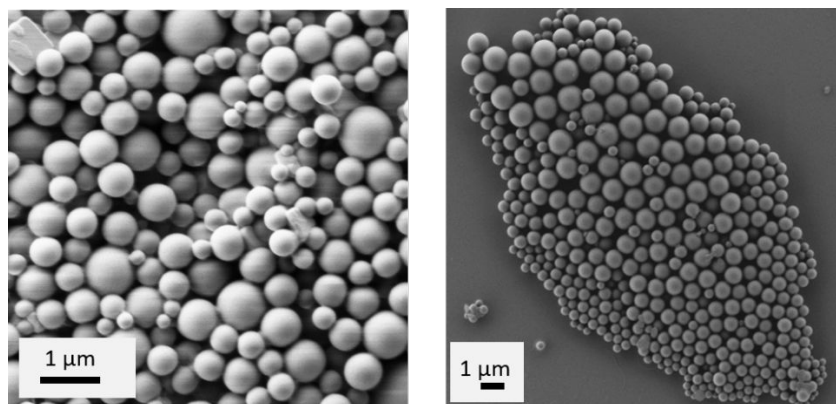

**Figure S3.** SEM images of polystyrene nanoparticles prepared by free-radical miniemulsion polymerization of styrene, stabilized with the SMS-derived biobased surfactant.

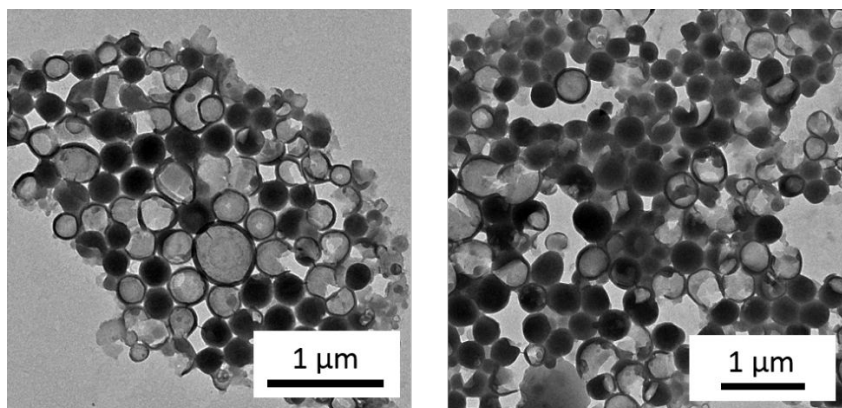

**Figure S4.** TEM image of nanocarriers obtained from SMS-derived lignin (from Organosolv process).

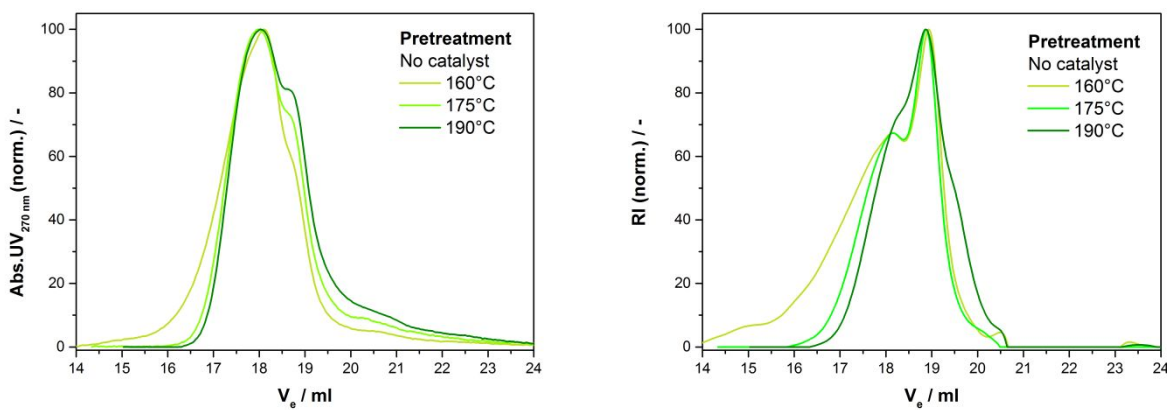

**Figure S5.** SEC elugrams using UV-detection (270 nm, left) or RI-detection (right) from extracts obtained from thermochemical pretreatments under 160°C, 175°C or 190°C without catalyst.

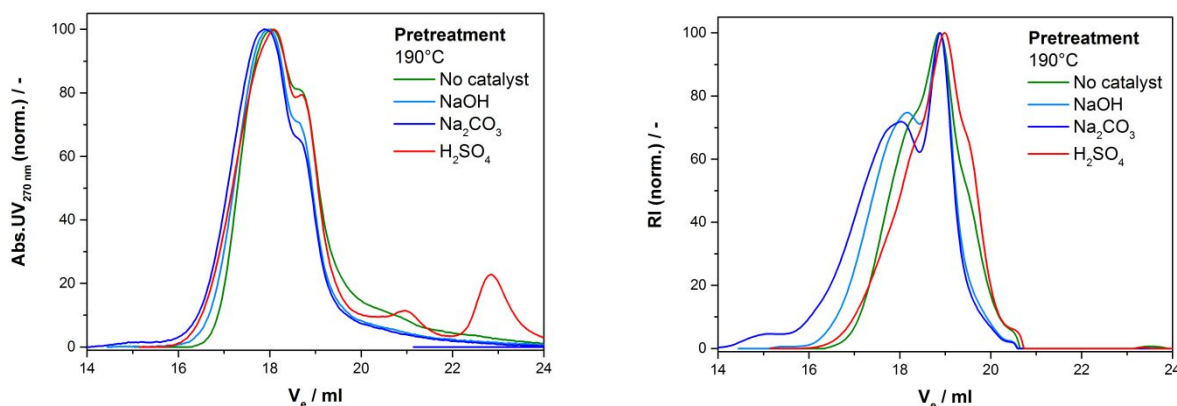

**Figure S6.** SEC elugrams using UV-detection (270 nm, left) or RI-detection (right) from extracts obtained from thermochemical pretreatments under 190°C using different catalysts.

**a) Pristine SMS**

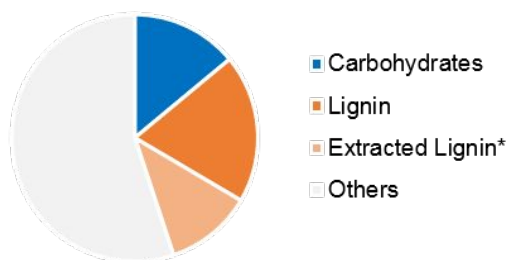

\*Organosolv extraction (Water-EtOH 50:50)

**b) SMS - Wheat Straw (4/6)**

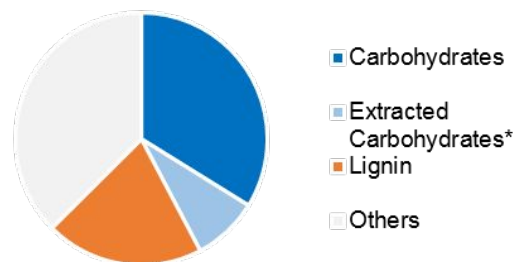

\* Thermochemical pretreatment (190°C, Catalyst: H<sub>2</sub>SO<sub>4</sub>)

**Figure S7.** Composition of pristine SMS and a SMS-wheat straw mixture (ratio 4:6). All fractions are given in weight % of dry mass. The carbohydrates include glucan, xylan, arabinan, glucose, xylose and arabinose. Exemplarily, a) the amount of lignin isolated using Organosolv extraction (EtOH-Water 50:50) or b) the amount of isolated carbohydrates applying a thermochemical pretreatment (190°C, catalyst: H<sub>2</sub>SO<sub>4</sub>) is shown.

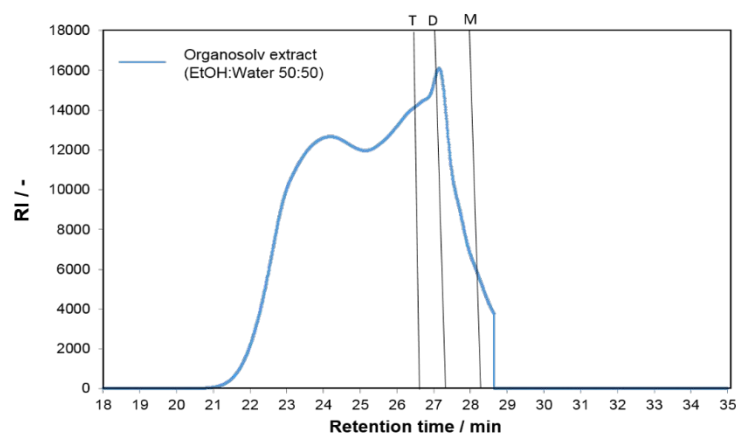

**Figure S8.** SEC elugram of “organosolv extract” obtained after extraction with an EtOH-water mixture (50:50). (M = Monomer; D = Dimer; T = Trimer)
